# Supplementary material for: Structure of the type VI secretion system TssK–TssF–TssG baseplate subcomplex revealed by cryo-electron microscopy
Source: PubMed Central journal article supplement (PMC6300606; doi:10.1038/s41467-018-07796-5), 2018-12-19
Supplement: 41467_2018_7796_MOESM1_ESM.pdf [file 41467_2018_7796_MOESM1_ESM.pdf]

**Structure of the type VI secretion system TssK-TssF-TssG baseplate  
subcomplex revealed by cryo-electron microscopy**

**Supplementary Information**

Young-Jun P *et al*<sup>1</sup>

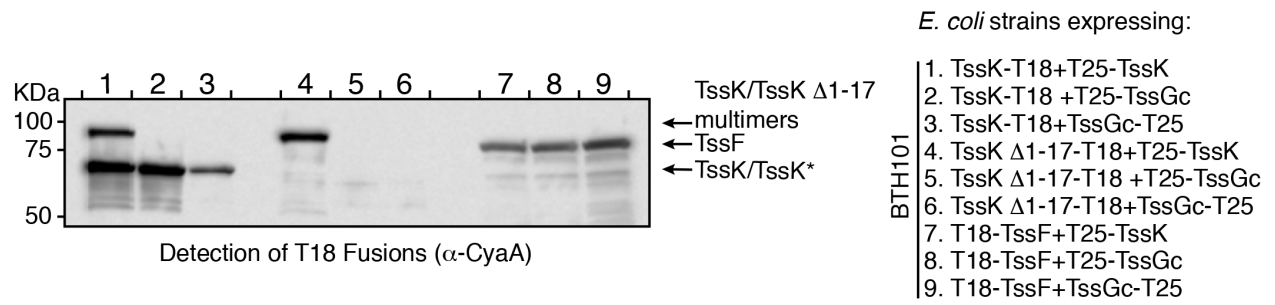

**Supplementary Figure 1. Western blot of T18-fused expression constructs utilized in BATCH.**

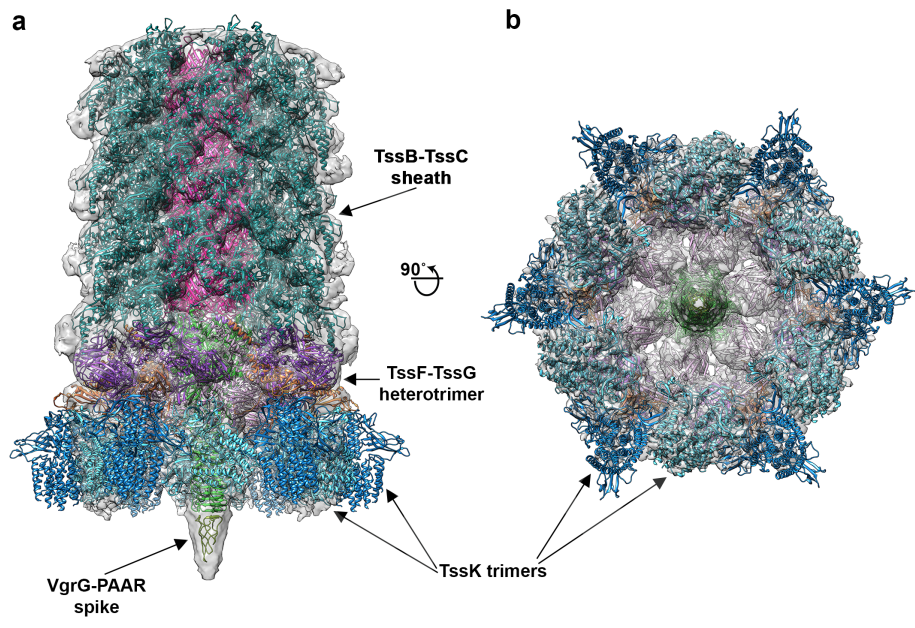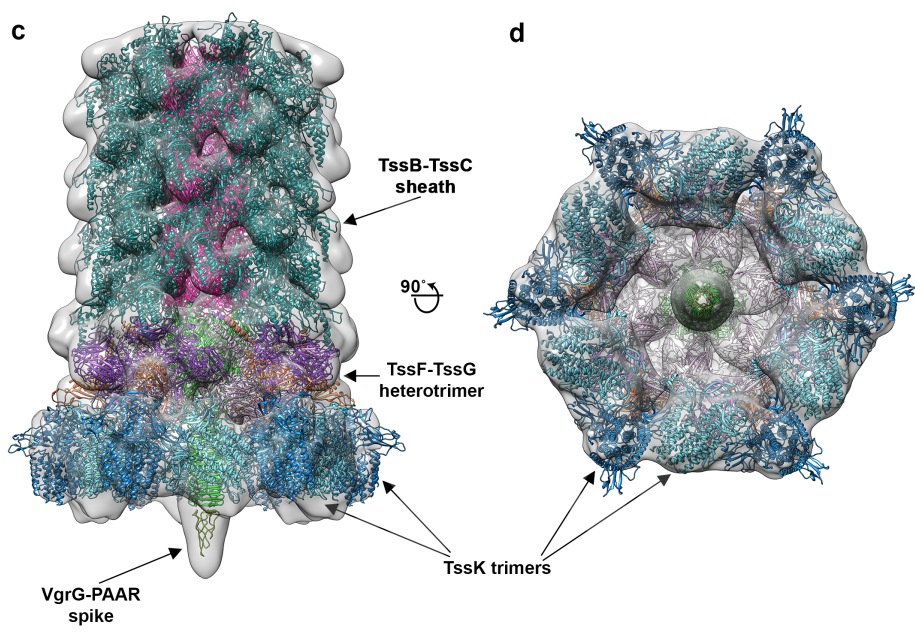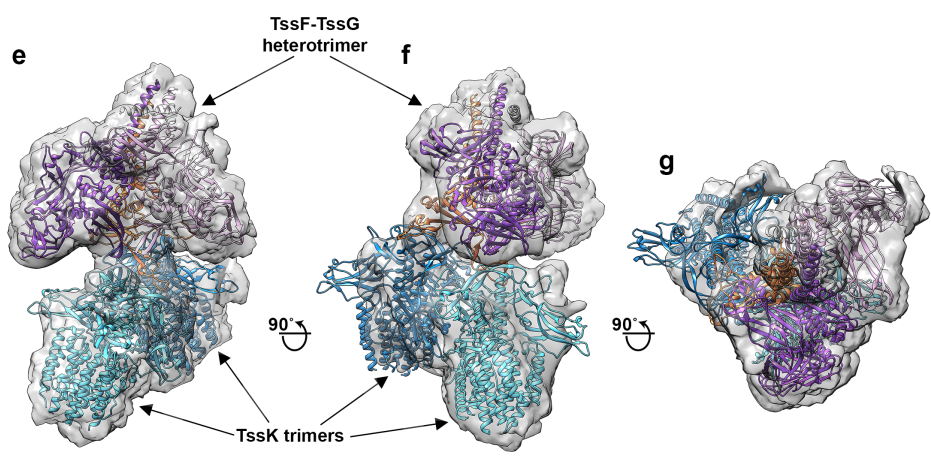

**Supplementary Figure 2. Supramolecular architecture of the T6SS baseplate and needle complex before sheath contraction. a-b.** Two orthogonal views of the model obtained by rigid-body docking subcomplex structures into the single particle cryoEM reconstruction of the non-contractile sheath mutant of the *Vibrio Cholera* T6SS baseplate/needle at 8 Å resolution (EMD 3879)<sup>45</sup>. TssK trimers are poorly resolved due to conformational heterogeneity and/or substoichiometric incorporation. **c-d.** Identical renderings than the ones shown in panels (c-d), after low-pass filtering the T6SS baseplate/needle map to 20 Å resolution, showing resolved density for TssK. **e-g.** Ribbon diagrams in orthogonal orientations of the TssK<sub>SN</sub>-TssF-TssG structure determined in this manuscript fitted in the T6SS baseplate/needle map low-pass filtered to 20 Å. TssK<sub>SN</sub>-TssF-TssG: blue-purple-pink, with two short unassigned segments colored light grey; TssB-TssC: teal (PDB ID 3j9g)<sup>19</sup>; Hcp: magenta (PDB 5OJQ); VgrG-PAAR: green-olive (PDB ID 4MTK and 4JIV)<sup>9</sup>.

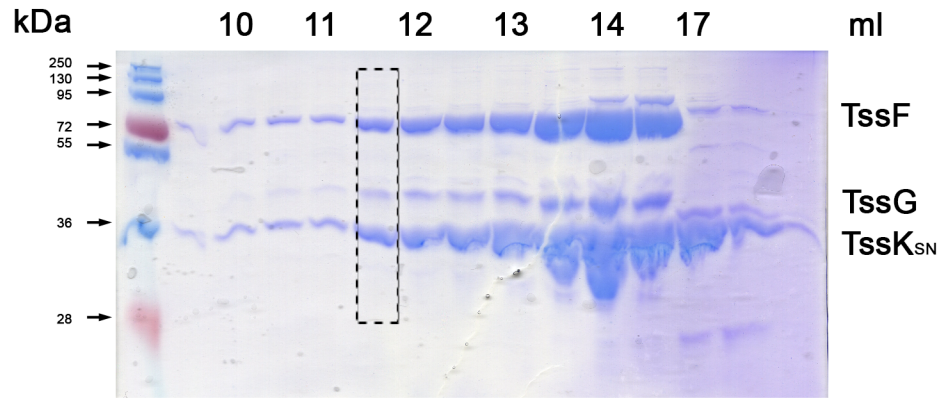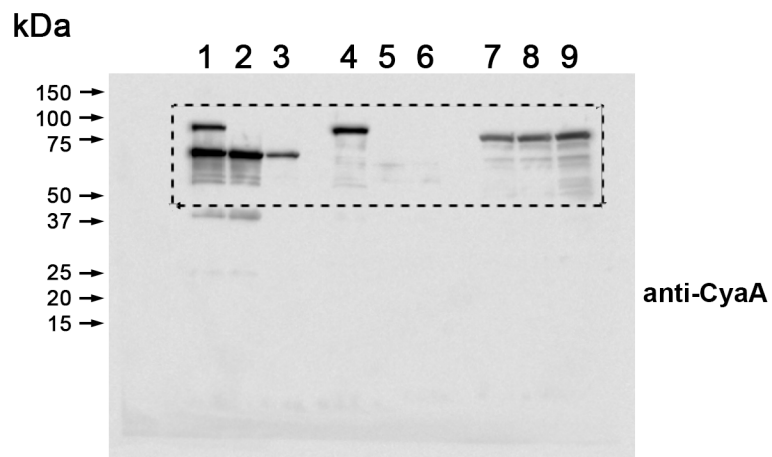

Supplementary Figure 3. Uncropped blots and gels.
